# Supplementary figures and images for: Flavonoids and Phenolic Acids from Aerial Part of Ajuga integrifolia (Buch.-Ham. Ex D. Don): Anti-Shigellosis Activity and In Silico Molecular Docking Studies
Source: MDPI journal article supplement (doi:10.3390/molecules28031111), 2023-01-22

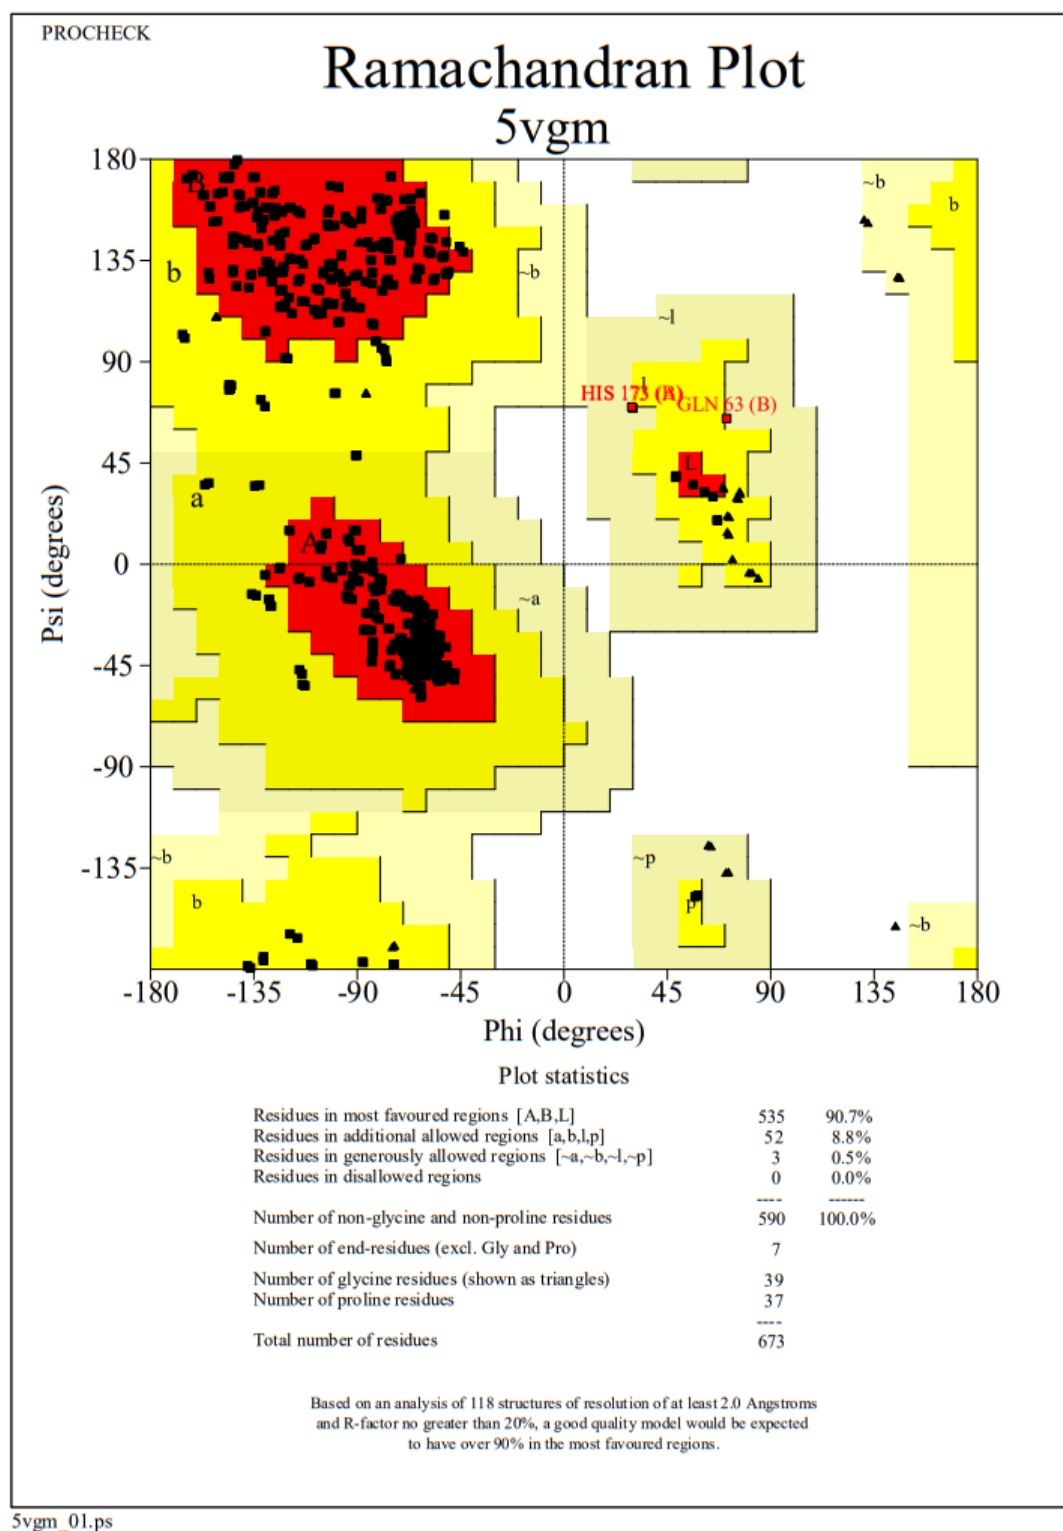

Figure S1. Main Ramachandran plot for 5VGM

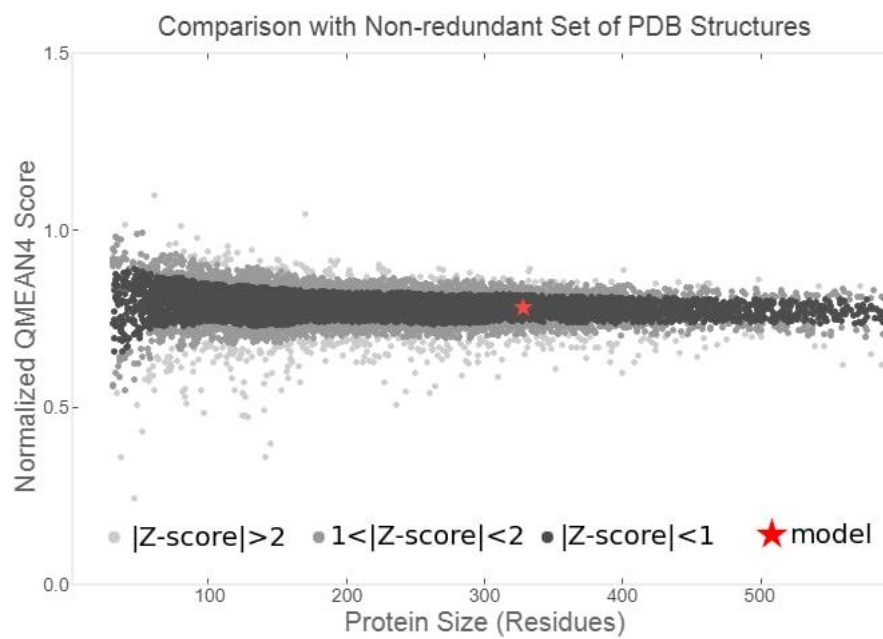

Figure S2. Quality -Comparison for 5VGM

Supplement: s1 [file s1]
